# Supplementary material
Source: PubMed Central journal article supplement (PMC4120649)
Supplement: NIHMS575798-supplement-supplemental_tables.pdf [file NIHMS575798-supplement-supplemental_tables.pdf]

**Online Supplement**

**Retinal Vascular Caliber and the Development of Hypertension:  
A Meta-analysis of Individual Participant Data**

**Supplementary Table I. Retinal vascular caliber measurements of 6 studies contributing data**

| Study abbreviation | Year of publication | Retinal camera | Angle of field of view | Mydriasis (Yes/no) | Image type                | Eye & field of image graded | Image processing software                                             | Summary Formula |
|--------------------|---------------------|----------------|------------------------|--------------------|---------------------------|-----------------------------|-----------------------------------------------------------------------|-----------------|
| ARIC               | 2004                | Canon CR6-45NM | 45°                    | no                 | Non-stereoscopic; Film    | Right; OD                   | Retinal Analysis [computer program]. Version 1. Madison, WI: Optimate | Parr-Hubbard    |
| MESA               | 2009                | Canon CR6-45NM | 45°                    | no                 | Non-stereoscopic; Digital | Right; OD                   | Retinal Analysis (later version)                                      | Knudtson        |
| BMES               | 2004/2008           | Zeis FF3       | 30°                    | yes                | Stereoscopic; Film        | Right; OD                   | Retinal Analysis [computer program]. Version 1. Madison, WI: Optimate | Parr-Hubbard    |
| AusDiab            | *                   | Canon CR45UAF  | 45°                    | no                 | Stereoscopic; Digital     | Right; OD                   | Retinal Analysis (later version)                                      | Parr-Hubbard    |
| Funagata           | 2010                | Canon CR5-NM45 | 45°                    | no                 | Non-stereoscopic; Film    | Right; OD                   | Retinal Analysis [computer program]. Version 1. Madison, WI: Optimate | Parr-Hubbard    |
| BDES               | 2004                | Zeis FF3       | 30°                    | yes                | Stereoscopic; Film        | Right; OD                   | Retinal Analysis [computer program]. Version 1. Madison, WI: Optimate | Parr-Hubbard    |

\*Studies that had not previously published their findings;

Abbreviations: ARIC, Atherosclerosis Risk in Communities; AusDiab, Australian Diabetes, Obesity and Lifestyle; BDES, Beaver Dam Eye study; BMES, Blue Mountains Eye Study; MESA, Multi-Ethnic Study of Atherosclerosis; OD: field centred on optic disc.

**Supplementary Table II. Blood pressure assessment of 6 studies contributing data**

| Study abbreviation | Device                                                                           | Body position                         | Location of measurement | Number of measurements | Readings used in analysis                                                                                                                |
|--------------------|----------------------------------------------------------------------------------|---------------------------------------|-------------------------|------------------------|------------------------------------------------------------------------------------------------------------------------------------------|
| ARIC               | random zero sphygmomanometer                                                     | Sitting                               | arm                     | 3                      | Mean of the 2 <sup>nd</sup> and 3 <sup>rd</sup> readings                                                                                 |
| MESA               | automated oscillometric sphygmomanometer                                         | Sitting                               | arm                     | 3                      | Mean of the 2 <sup>nd</sup> and 3 <sup>rd</sup> readings                                                                                 |
| BMES               | mercury sphygmomanometer                                                         | Sitting                               | arm                     | 1                      | Single reading                                                                                                                           |
| AusDiab            | mercury sphygmomanometer (baseline)/ automated blood pressure monitor(follow-up) | Supine(baseline) /sitting (follow-up) | arm                     | 3                      | Mean of the first two readings or mean of the two closest readings if the difference between the first two readings greater than 10 mmHg |
| Funagata           | mercury sphygmomanometer                                                         | Sitting                               | arm                     | 1                      | Single reading                                                                                                                           |
| BDES               | random zero sphygmomanometer                                                     | Sitting                               | arm                     | 3                      | Mean of the 2 <sup>nd</sup> and 3 <sup>rd</sup> readings                                                                                 |

Abbreviations: ARIC, Atherosclerosis Risk in Communities; AusDiab, Australian Diabetes, Obesity and Lifestyle; BDES, Beaver Dam Eye study; BMES, Blue

Mountains Eye Study; MESA, Multi-Ethnic Study of Atherosclerosis.

**Supplementary Table III. Overall odds ratios (OR) of incident hypertension by retinal vascular caliber, adjusted for risk factors**

|                                               | No. of participants | No. of events | CRAE               |                | CRVE               |                |
|-----------------------------------------------|---------------------|---------------|--------------------|----------------|--------------------|----------------|
|                                               |                     |               | Overall OR (95%CI) | I-squared (p)* | Overall OR (95%CI) | I-squared (p)* |
| <b>Progressive adjustment</b>                 |                     |               |                    |                |                    |                |
| Model 1: age, sex, race                       | 10229               | 2590          | 1.65(1.53,1.79)    | 11.4%(0.34)    | 1.28(1.21,1.36)    | 0.0%(0.72)     |
| Model 2: plus smoking, BMI, total cholesterol | 10092               | 2544          | 1.61(1.49,1.75)    | 15.7%(0.31)    | 1.23(1.16,1.31)    | 0.0%(0.60)     |
| Model 3: plus SBP                             | 10092               | 2544          | 1.29(1.20,1.39)    | 0.0%(0.58)     | 1.14(1.06,1.23)    | 21.7%(0.27)    |

\* p value of test for heterogeneity; BMI, body mass index; SBP, systolic blood pressure.

**Supplementary Table IV. Overall odds ratio (OR) of incident hypertension, by retinal vascular caliber variables in subgroups**

| Variable               | Persons at risk | Incident cases of hypertension | Odds Ratio (95%CI)* |                    |                  |                   |
|------------------------|-----------------|--------------------------------|---------------------|--------------------|------------------|-------------------|
|                        |                 |                                | CRAE†               | P for interaction§ | CRVE‡            | P for interaction |
| Age group, years       |                 |                                |                     | 0.03               |                  | 0.07              |
| <60                    | 6430            | 1429                           | 1.44(1.30,1.60)     |                    | 1.13(1.04,1.23)  |                   |
| 60-69                  | 2940            | 815                            | 1.18(1.03,1.34)     |                    | 1.14(1.02,1.27)  |                   |
| ≥70                    | 850             | 355                            | 0.99(0.80,1.21)     |                    | 0.93(0.80, 1.09) |                   |
| Sex                    |                 |                                |                     | 0.54               |                  | 0.68              |
| Men                    | 4482            | 1105                           | 1.25(1.12,1.40)     |                    | 1.13(1.03,1.24)  |                   |
| Women                  | 5747            | 1494                           | 1.30(1.18,1.44)     |                    | 1.07(1.00,1.17)  |                   |
| Ethnicity              |                 |                                |                     | 0.28               |                  | 0.25              |
| White                  | 7502            | 1728                           | 1.30(1.18,1.42)     |                    | 1.09(1.01,1.17)  |                   |
| Non-white              | 2727            | 871                            | 1.26(1.11,1.44)     |                    | 1.13(1.02,1.26)  |                   |
| Prehypertension        |                 |                                |                     | 0.09               |                  | 0.04              |
| Yes                    | 3941            | 1775                           | 1.22(1.11,1.34)     |                    | 1.07(1.00,1.16)  |                   |
| No                     | 6,288           | 824                            | 1.40(1.24,1.59)     |                    | 1.16(1.05,1.28)  |                   |
| Current smoker         |                 |                                |                     | 0.15               |                  | 0.25              |
| Yes                    | 1832            | 486                            | 1.34(1.12,1.59)     |                    | 1.09(0.96,1.25)  |                   |
| No                     | 8364            | 2102                           | 1.28(1.17,1.39)     |                    | 1.11(1.03,1.18)  |                   |
| BMI, kg/m <sup>2</sup> |                 |                                |                     | 0.99               |                  | 0.16              |
| <25.0                  | 3897            | 827                            | 1.23(1.08,1.40)     |                    | 1.11(1.00,1.24)  |                   |
| 25.0-29.0              | 3533            | 923                            | 1.32(1.16,1.50)     |                    | 1.15(1.04,1.28)  |                   |
| ≥29.0                  | 2785            | 841                            | 1.31(1.15,1.50)     |                    | 1.03(0.93,1.14)  |                   |

\* Odds ratios from a multilevel effects discrete time logistic model with retinal arteriolar and venular calibers as the main exposures, age, sex, race/ethnicity, current smoker, body mass index, total cholesterol level and systolic blood pressure at baseline as covariates (where appropriate) and study as the random effect; † Per 20 μm narrower CRAE; ‡ Per 20 μm larger CRVE.; § p-value for CRAE\*covariate; ||p-value for CRVE\*covariate.

**Supplementary Table V. Associations of retinal vascular caliber with baseline systolic blood pressure and the average rate of change in systolic blood pressure over 5 years (meta-analysis of regression coefficients in 6 studies)**

|                                     | Baseline SBP<br>(mmHg) |              |               | Rate of Change in SBP<br>(mmHg) |               |              |
|-------------------------------------|------------------------|--------------|---------------|---------------------------------|---------------|--------------|
|                                     | Pooled<br>β Estimate§  | 95%CI        | I-squared(p)  | Pooled<br>β Estimate§           | 95%CI         | I-squared(p) |
| <b>Retinal arteriolar narrowing</b> |                        |              |               |                                 |               |              |
| Per 20μm difference in CRAE         | 2.99                   | (1.56,4.42)‡ | 88.9%(<0.001) | 1.12                            | (0.25, 1.99)* | 40.3%(0.14)  |
| <b>Retinal venular widening</b>     |                        |              |               |                                 |               |              |
| Per 20μm difference in CRVE         | 1.38                   | (0.73,2.04)‡ | 61.3%(0.02)   | 0.44                            | (-0.34,1.21)  | 41.9%(0.13)  |

P values \*<0.05; †<0.01; ‡<0.001;

§ The regression coefficient was adjusted for age, sex, race, follow-up time or occasions, baseline smoking status, BMI, total cholesterol and the fellow retinal vascular caliber in a mixed linear model in each study. Results were pooled using random effect meta-analysis.

|| p value of test for heterogeneity .

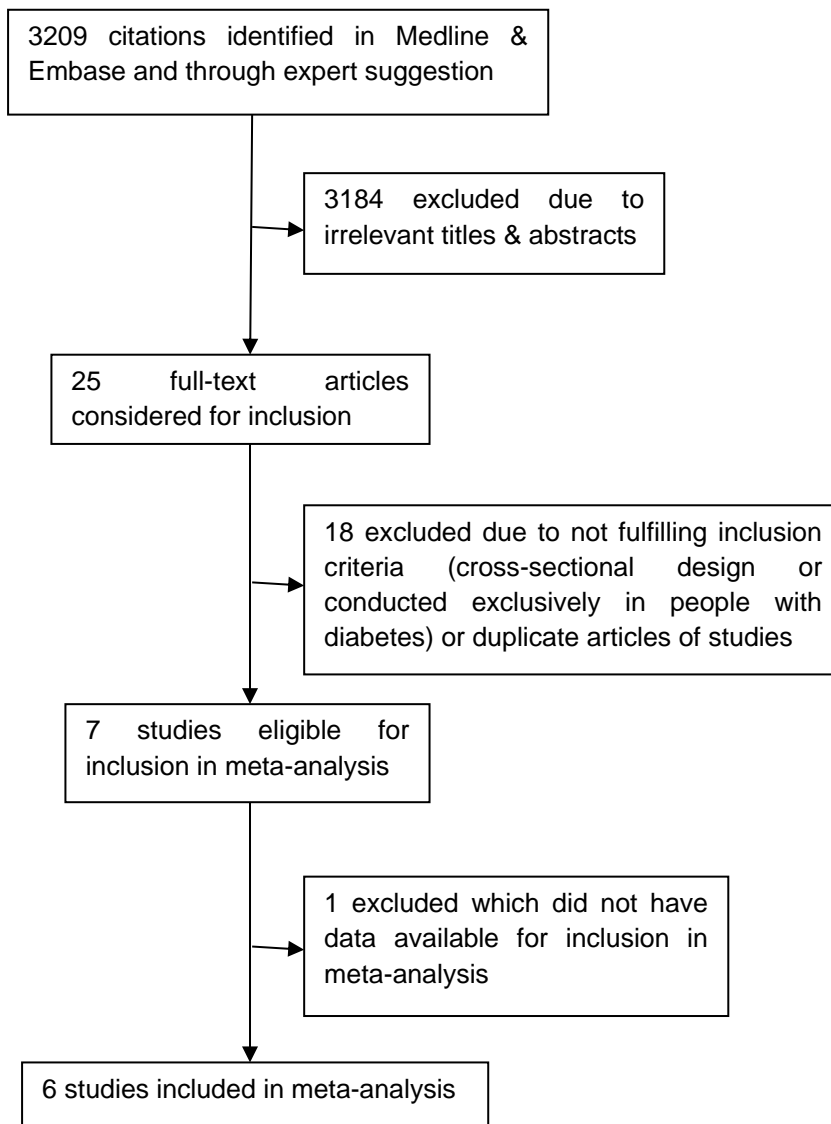

**Supplementary Figure I. Flow diagram of selection of studies for inclusion in meta-analysis.**

(a)

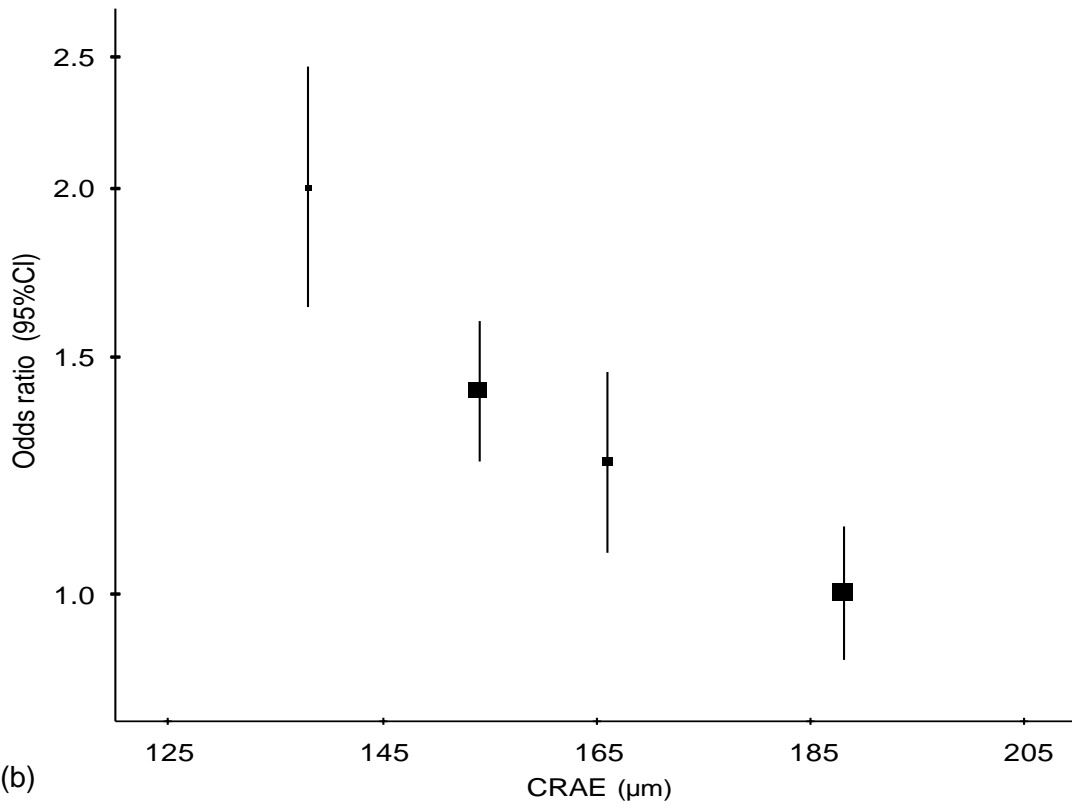

(b)

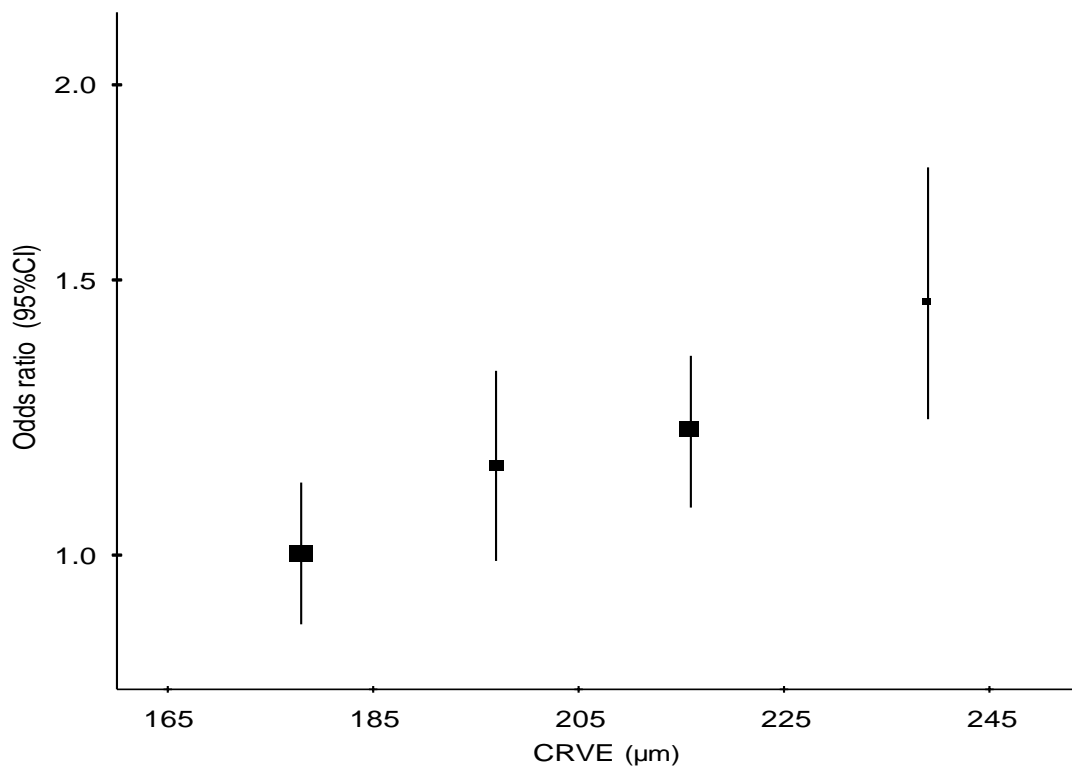



**Supplementary Figure II. Overall adjusted odds ratios (OR) (model 3) of incident hypertension by quartiles of baseline retinal vascular caliber.** Data shown for CRAE (A) and CRVE (B) relative to the highest or lowest quartile. Vertical error bars show 95% CIs estimated from variances reflecting the amount of information within each group including the reference group. Sizes of the data markers are proportional to the inverse of the variance of the  $\log_e$  ORs.
